# Supplementary material for: Australian Mental Health Consumers’ Experiences of Service Engagement and Disengagement: A Descriptive Study
Source: MDPI journal article supplement (doi:10.3390/ijerph181910464), 2021-10-05
Supplement: s1 [file s1]

## **Supplementary File S1: Survey Questions**

### **Q1. In which state/territory do you live?**

Victoria  
South Australia  
New South Wales  
Queensland  
Tasmania  
Western Australia  
Northern Territory  
Australian Capital Territory

### **Q2. Are you located in a**

Capital City  
Regional Centre  
Remote Town

### **Q3. Are you**

Male  
Female  
Other

### **Q4. What is your age range?**

under 20 years  
20 - 39 years  
40 - 49 years  
50-59 years  
60-69 years  
70-79 years  
80 years or above

### **Q5. Are you of Aboriginal or Torres Strait Islander descent?**

Yes  
No  
Prefer not to answer

### **Q6. What is your country of birth if not Australia?**

### **Q7. What language do you mostly speak at home?**

English  
Other (please specify below)

### **Q8. Are you completing this survey as a:**

Consumer (someone with a mental illness or experience of mental ill-health)?  
Carer or Family Member

### **Q9. Select from the following options the one which best describes what services, health professional or supports you have mainly used in the past 5 years for your mental health**

Public mental health services/hospitals/community teams  
Private mental health services/hospitals  
My GP  
Only used a Private Psychiatrist  
A Psychologist, counsellor/therapist  
Veteran supports

Peer support (organised or unorganised)  
Telehealth  
Online or digital resources or Apps  
Other (please specify)

**Q10. Please explain the main reasons why you use this as your primary source of mental health support?**

**Rate each**

**of the following reasons**

Answer Choices a. Major Contributing Reason b.

Contributing Reason c. Not a Contributing Reason d. Not Applicable

I don't have to wait too long to see someone

The service meets my needs

They don't make me repeat my story too much

They listen to me

They include/collaborate with me

I feel I have some say or control in making decisions

They include my family/carer

They respect my privacy if I don't want to include my family

I trust them

I feel safe there

I don't feel judged / stigmatised by them

I can afford to pay for this service

Limited options/choice of service providers in my area

I have a consistent worker

They are organised and coordinate the support services I need

They seem to have a clear plan/goals

I am able to see a worker whose gender is of my choosing

Other (please specify)

**Q11. If you used digital resources or Apps, which of the following influenced your decision to commence an online**

**course for mental health and wellbeing? (Select all that apply)**

My health professional recommended that I do the course

My friends or family recommended that I do the course

It was convenient for me to access due to limited availability of other mental health services in my local area

It was convenient for me to access due to my limited availability to attend a face-to-face treatment

It was convenient for me to access outside of the normal consultation (business) hours

The cost of face-to-face services

I chose to remain anonymous and limit personal information shared

I wanted to control the level of contact I have with my service provider (e.g. no contact with doctor, only receive feedback via email)

I was on the wait list for other services

I previously used other services or treatments but was dissatisfied

I previously used or was still using other services but I wanted to try something new

I prefer to use digital services rather than face-to-face services

The reputation of the institutes providing the online course

The scientific evidence supporting the online course

Not Applicable

Other (please specify)

**Q12. At the time when you enrolled into an online course, what other support or treatment were you receiving to**

**manage or improve your mental health and well-being? (Select all that apply)**

None  
Another online program  
Medication  
Face-to-face therapy with mental health professional (e.g., psychiatrist, psychologist, social worker, mental health worker)  
Group therapy (including as an outpatient in a hospital setting)  
Participation in an exercise group subsidised under Mental Health Treatment Plan  
Alternative medicine (e.g. naturopathy, homeopathy, acupuncture)  
Not Applicable  
Other (please specify)

**Q13. If you didn't complete the online course, please indicate why: (Select all that apply)**

I was not ready to commit to an online course at the time  
I wanted to discuss it first with my health professional  
I no longer felt that I needed to do the course  
The cost of the course was too high  
I accessed another service and/or started another treatment  
I experienced technical difficulties  
I didn't improve  
Not Applicable  
Other (please specify)

**Q14. After you realised you needed support, were you able to access a mental health service or a health professional in a reasonable time?**

Yes  
No  
Please Comment:

**Q15. Were there particular qualities of the service that helped you to feel more comfortable engaging with them?**

Yes  
No  
Please Comment:

**Q16. Were there particular qualities of the health professional that helped you to feel more comfortable engaging with them?**

Yes  
No  
Please Comment:

**Q17. Were there particular things about them that made you feel uncomfortable and not want to engage with them?**

Yes  
No  
Please Comment:

**Q18. Did this health professional or service help you for the length of time you felt you needed?**

Yes  
No

**Q19. If no, did you or the health professional or service make the decision to end your support?**

Myself  
Service  
Other  
Unsure

Please Comment:

**Q20. If no, did/are you intending to find alternative help for your mental health issues?**

Yes  
No

**Q21. Do you think that disengagement (stopping) use of mental health services is an issue for a lot of people?**

Yes  
No  
Unsure

Please explain the main reasons for your response:

**Q22. Did the health professional or service give you and your family and carer sufficient notice of your impending discharge?**

Yes  
No  
Unsure

Please explain the main reasons for your response:

**Q23. Thinking about the health professional or service that you decided not to engage with (continue with) in the past, what was the primary reason you decided to stop (disengage)?**

Answer choices

- a. Major Contributing Reason
- b. Contributing Reason
- c. Not a Contributing Reason
- d. Unsure

Wait times were too long

A referral was required but I didn't get one when I asked

Discharged from mental health professional/mental health service with no follow-up

The service didn't meet my needs (wrong care)

The service didn't offer me the right type of support that I needed

Cost was prohibitive/ I couldn't afford to pay for it

Limited options/choice of service providers in my area

Worker changed frequently/ no consistent worker

Told that I didn't meet/no longer met criteria of the service

Lack of plan/goals/didn't seem to be progressing/going anywhere

Didn't need the full number of appointments as I felt better quickly

Other

Please comment:

**Q24. From a personal perspective, thinking about services that you decided not to engage with (continue with) in the past, what was the primary reason you decided to stop (disengage)?**

Answer choices

- a. Major Contributing Reason
- b. Contributing Reason
- c. Not a Contributing Reason
- d. Unsure

Made me repeat my story too much

Didn't listen to me

Didn't include/collaborate with me

I felt I had little say or control in making decisions  
Didn't include my family/carer  
My family was included and I didn't like that  
I didn't trust them  
I didn't feel safe there  
I felt judged / stigmatised by them  
I was forgotten about  
Decided to stop because another service was better for me  
I felt better and had recovered  
Decided my family or close friends supported me better  
Peer support worker was best suited to my needs  
Community support groups were best for me  
Other  
Please comment:

**Q25. How did you find the communication and collaboration between health professionals and/or services?**

No coordination  
There was not a referral to other services  
I was discharged from hospital with no referral or follow up  
I was discharged from community services before I was ready  
I was discharged with no other option  
I felt I fell through the cracks  
It wasn't clear who I could contact when I needed to  
I didn't have a consistent person who I could contact or speak to  
Each time I contacted them for help, I had to retell my story / they didn't seem to remember my situation, needs or preferences

**Q26. If you decided not to continue but need support now or likely to in the future, which health professional or service will you try to re-engage with? Please tick all that are relevant to you**

None  
Psychiatrist  
Psychologist  
Social Worker  
Public community mental health  
Public mental health inpatient unit  
Private psychiatric hospital  
Headspace  
Counsellor/therapist  
GP  
Peer worker  
Other  
Please Comment:

**Q27. If you have found yourself in a crisis, would you please indicate whether any of the following contributed to the deterioration in your condition:**

Couldn't access support when needed  
Didn't have a regular health professional that I could get help from  
Not connected to existing services  
Regular health professional not available  
Social issues  
Other

Please Comment

**Q28. When you found yourself in a crisis, did you seek help through an emergency department?**

Yes

No

Not Applicable

**Q29. If you answered yes, and you were not admitted to hospital, could you please explain what happened after you were discharged?**

Went home

Went to my family or friends

No referral to mental health services

No referral to a health professional

Given a discharge letter to my GP

Given a Referral to a community mental health service

Organised consultation with community mental health team

Referral to a psychiatrist or psychologist

No follow up

Other

Please Comment

**Q30. What do you think would help people stay engaged with health professionals or services or return to a health professional or service to receive support for their mental health? Please tell us your ideas**

**Q31. What would assist/support people to re-engage with services where they had previously disengaged from them? Please tell us your ideas**

**Q32. From your experience, what do people do/what happens to them after they disengage with services? Please comment:**

**Q33. How do you think services could best re-engage with people who have disengaged with mental health support from services? Please tell us your ideas**

**Q34. What services would you like to access to support your mental health and wellbeing that you can't access at the moment? Please comment**

**Supplementary Table S1: Frequency of Reasons for Engagement with Mental Health Services**

|                                                               | MAJOR<br>CONTRIBUTING<br>REASON (1)– | CONTRIBUTING<br>REASON (2)– | NOT A<br>CONTRIBUTING<br>REASON (3)– | NOT<br>APPLICABLE<br>(4)– | TOTAL– |
|---------------------------------------------------------------|--------------------------------------|-----------------------------|--------------------------------------|---------------------------|--------|
| They listen to me                                             | 52.36%<br>144                        | 32.73%<br>90                | 11.27%<br>31                         | 3.64%<br>10               | 275    |
| They include/collaborate with me                              | 49.45%<br>136                        | 31.27%<br>86                | 14.18%<br>39                         | 5.09%<br>14               | 275    |
| I feel safe there                                             | 50.00%<br>136                        | 34.56%<br>94                | 11.03%<br>30                         | 4.41%<br>12               | 272    |
| I trust them                                                  | 48.73%<br>134                        | 36.73%<br>101               | 9.45%<br>26                          | 5.09%<br>14               | 275    |
| I feel I have some say or control in making decisions         | 48.35%<br>132                        | 36.63%<br>100               | 9.89%<br>27                          | 5.13%<br>14               | 273    |
| I don't feel judged / stigmatised by them                     | 46.18%<br>127                        | 35.27%<br>97                | 13.45%<br>37                         | 5.09%<br>14               | 275    |
| I can afford to pay for this service                          | 44.32%<br>121                        | 23.44%<br>64                | 19.41%<br>53                         | 12.82%<br>35              | 273    |
| The service meets my needs                                    | 41.30%<br>114                        | 40.94%<br>113               | 13.77%<br>38                         | 3.99%<br>11               | 276    |
| They don't make me repeat my story too much                   | 36.40%<br>99                         | 31.99%<br>87                | 25.00%<br>68                         | 6.62%<br>18               | 272    |
| I don't have to wait too long to see someone                  | 35.29%<br>96                         | 34.93%<br>95                | 21.69%<br>59                         | 8.09%<br>22               | 272    |
| I have a consistent worker                                    | 35.69%<br>96                         | 29.00%<br>78                | 13.38%<br>36                         | 21.93%<br>59              | 269    |
| Limited options/choice of service providers in my area        | 34.94%<br>94                         | 21.19%<br>57                | 27.88%<br>75                         | 15.99%<br>43              | 269    |
| They respect my privacy if I don't want to include my family  | 23.53%<br>64                         | 26.10%<br>71                | 21.32%<br>58                         | 29.04%<br>79              | 272    |
| They are organised and coordinate the support services I need | 20.66%<br>56                         | 28.04%<br>76                | 28.04%<br>76                         | 23.25%<br>63              | 271    |
| I am able to see a worker whose gender is of my choosing      | 19.63%<br>53                         | 16.67%<br>45                | 35.93%<br>97                         | 27.78%<br>75              | 270    |
| They seem to have a clear plan/goals                          | 18.75%<br>51                         | 35.29%<br>96                | 30.88%<br>84                         | 15.07%<br>41              | 272    |
| They include my family/carers                                 | 10.26%<br>28                         | 10.62%<br>29                | 36.26%<br>99                         | 42.86%<br>117             | 273    |

**Supplementary Table S2: Frequency of Logistical Reasons for Disengagement from Mental Health Services**

|                                                                                    | MAJOR<br>CONTRIBUTING<br>REASON (1)- | SOMEWHAT<br>CONTRIBUTING<br>REASON (2)- | NOT A<br>CONTRIBUTING<br>REASON (3)- | UNSURE<br>(4)- | TOTAL- |
|------------------------------------------------------------------------------------|--------------------------------------|-----------------------------------------|--------------------------------------|----------------|--------|
| The service didn't offer me the right type of support that I needed                | 47.64%<br>101                        | 27.83%<br>59                            | 23.11%<br>49                         | 1.42%<br>3     | 212    |
| The service didn't meet my needs (wrong care)                                      | 45.75%<br>97                         | 24.53%<br>52                            | 26.89%<br>57                         | 2.83%<br>6     | 212    |
| Cost was prohibitive/ I couldn't afford to pay for it                              | 42.45%<br>90                         | 19.34%<br>41                            | 34.43%<br>73                         | 3.77%<br>8     | 212    |
| Limited options/choice of service providers in my area                             | 35.89%<br>75                         | 25.36%<br>53                            | 36.36%<br>76                         | 2.39%<br>5     | 209    |
| Lack of plan/goals/didn't seem to be progressing/going anywhere                    | 34.78%<br>72                         | 25.12%<br>52                            | 35.27%<br>73                         | 4.83%<br>10    | 207    |
| Discharged from mental health professional/mental health service with no follow-up | 34.13%<br>71                         | 20.19%<br>42                            | 42.79%<br>89                         | 2.88%<br>6     | 208    |
| Wait times were too long                                                           | 27.54%<br>57                         | 20.77%<br>43                            | 48.31%<br>100                        | 3.38%<br>7     | 207    |
| Told that I didn't meet/no longer met criteria of the service                      | 23.76%<br>48                         | 13.37%<br>27                            | 58.42%<br>118                        | 4.46%<br>9     | 202    |
| Worker changed frequently/ no consistent worker                                    | 21.95%<br>45                         | 19.51%<br>40                            | 52.68%<br>108                        | 5.85%<br>12    | 205    |
| A referral was required but I didn't get one when I asked                          | 10.89%<br>22                         | 13.37%<br>27                            | 70.30%<br>142                        | 5.45%<br>11    | 202    |
| Didn't need the full number of appointments as I felt better quickly               | 4.55%<br>9                           | 7.58%<br>15                             | 81.31%<br>161                        | 6.57%<br>13    | 198    |
| Other                                                                              | 30.99%<br>22                         | 5.63%<br>4                              | 49.30%<br>35                         | 14.08%<br>10   | 71     |



**Supplementary Table S3: Frequency of Interpersonal Reasons for Disengagement from Mental Health Services**

|                                                           | MAJOR<br>CONTRIBUTING<br>REASON (1) | SOMEWHAT<br>CONTRIBUTING<br>REASON (2) | NOT A<br>CONTRIBUTING<br>REASON (3) | UNSURE (4)   | TOTAL |
|-----------------------------------------------------------|-------------------------------------|----------------------------------------|-------------------------------------|--------------|-------|
| Made me repeat my story too much                          | 29.47%<br>61                        | 27.05%<br>56                           | 42.03%<br>87                        | 1.45%<br>3   | 207   |
| Didn't listen to me                                       | 53.55%<br>113                       | 25.12%<br>53                           | 20.85%<br>44                        | 0.47%<br>1   | 211   |
| Didn't include/ collaborate with me                       | 45.93%<br>96                        | 22.01%<br>46                           | 30.62%<br>64                        | 1.44%<br>3   | 209   |
| I felt I had little say or control in making decisions    | 41.55%<br>86                        | 26.09%<br>54                           | 30.92%<br>64                        | 1.45%<br>3   | 207   |
| Didn't include my family/carer                            | 11.88%<br>24                        | 7.92%<br>16                            | 75.25%<br>152                       | 4.95%<br>10  | 202   |
| My family was included and I didn't like that             | 5.50%<br>11                         | 9.50%<br>19                            | 80.00%<br>160                       | 5.00%<br>10  | 200   |
| I didn't trust them                                       | 38.86%<br>82                        | 24.64%<br>52                           | 35.07%<br>74                        | 1.42%<br>3   | 211   |
| I didn't feel safe there                                  | 40.09%<br>85                        | 18.87%<br>40                           | 39.15%<br>83                        | 1.89%<br>4   | 212   |
| I felt judged / stigmatised by them                       | 47.20%<br>101                       | 22.43%<br>48                           | 29.44%<br>63                        | 0.93%<br>2   | 214   |
| I was forgotten about                                     | 32.21%<br>67                        | 21.63%<br>45                           | 44.23%<br>92                        | 1.92%<br>4   | 208   |
| Decided to stop because another service was better for me | 24.51%<br>50                        | 20.10%<br>41                           | 51.47%<br>105                       | 3.92%<br>8   | 204   |
| I felt better and had recovered                           | 7.80%<br>16                         | 9.27%<br>19                            | 79.02%<br>162                       | 3.90%<br>8   | 205   |
| Decided my family or close friends supported me better    | 6.90%<br>14                         | 11.82%<br>24                           | 76.85%<br>156                       | 4.43%<br>9   | 203   |
| Peer support worker was best suited to my needs           | 10.84%<br>22                        | 11.33%<br>23                           | 69.95%<br>142                       | 7.88%<br>16  | 203   |
| Community support groups were best for me                 | 9.41%<br>19                         | 15.35%<br>31                           | 68.81%<br>139                       | 6.44%<br>13  | 202   |
| Other                                                     | 19.44%<br>14                        | 6.94%<br>5                             | 58.33%<br>42                        | 15.28%<br>11 | 72    |

**Supplementary Table S4: Frequency of reasons for accessing GPs, ordered by major contributing reason**

|                                                               | MAJOR<br>CONTRIBUTING<br>REASON (1)<br>GP | CONTRIBUTING<br>REASON (2)<br>GP | NOT A<br>CONTRIBUTING<br>REASON (3)<br>GP | NOT<br>APPLICABLE (4)<br>GP | TOTAL<br>GP |
|---------------------------------------------------------------|-------------------------------------------|----------------------------------|-------------------------------------------|-----------------------------|-------------|
| They listen to me                                             | 52.88%<br>101                             | 32.46%<br>62                     | 13.09%<br>25                              | 1.57%<br>3                  | 191         |
| They include/collaborate with me                              | 52.36%<br>100                             | 29.84%<br>57                     | 15.71%<br>30                              | 2.09%<br>4                  | 191         |
| I feel I have some say or control in making decisions         | 51.05%<br>97                              | 35.79%<br>68                     | 10.00%<br>19                              | 3.16%<br>6                  | 190         |
| I feel safe there                                             | 50.00%<br>95                              | 33.68%<br>64                     | 13.16%<br>25                              | 3.16%<br>6                  | 190         |
| I trust them                                                  | 48.17%<br>92                              | 38.22%<br>73                     | 10.47%<br>20                              | 3.14%<br>6                  | 191         |
| I don't feel judged / stigmatised by them                     | 46.60%<br>89                              | 34.03%<br>65                     | 15.18%<br>29                              | 4.19%<br>8                  | 191         |
| I can afford to pay for this service                          | 46.35%<br>89                              | 23.96%<br>46                     | 18.75%<br>36                              | 10.94%<br>21                | 192         |
| They don't make me repeat my story too much                   | 39.15%<br>74                              | 29.63%<br>56                     | 26.46%<br>50                              | 4.76%<br>9                  | 189         |
| The service meets my needs                                    | 39.06%<br>75                              | 42.19%<br>81                     | 16.67%<br>32                              | 2.08%<br>4                  | 192         |
| I don't have to wait too long to see someone                  | 37.57%<br>71                              | 33.86%<br>64                     | 21.69%<br>41                              | 6.88%<br>13                 | 189         |
| I have a consistent worker                                    | 36.36%<br>68                              | 28.34%<br>53                     | 15.51%<br>29                              | 19.79%<br>37                | 187         |
| Limited options/choice of service providers in my area        | 33.87%<br>63                              | 21.51%<br>40                     | 29.03%<br>54                              | 15.59%<br>29                | 186         |
| They respect my privacy if I don't want to include my family  | 25.40%<br>48                              | 23.28%<br>44                     | 20.63%<br>39                              | 30.69%<br>58                | 189         |
| They are organised and coordinate the support services I need | 22.75%<br>43                              | 25.40%<br>48                     | 30.16%<br>57                              | 21.69%<br>41                | 189         |
| They seem to have a clear plan/goals                          | 20.11%<br>38                              | 33.86%<br>64                     | 31.75%<br>60                              | 14.29%<br>27                | 189         |
| I am able to see a worker whose gender is of my choosing      | 19.25%<br>36                              | 17.11%<br>32                     | 35.29%<br>66                              | 28.34%<br>53                | 187         |
| They include my family/carer                                  | 12.11%<br>23                              | 9.47%<br>18                      | 34.21%<br>65                              | 44.21%<br>84                | 190         |

**Supplementary Table S5: Frequency of reasons for accessing Public Mental Health Service, ordered by major contributing reason**

|                                                               | MAJOR CONTRIBUTING REASON (1) MHS | CONTRIBUTING REASON (2) MHS | NOT A CONTRIBUTING REASON (3) MHS | NOT APPLICABLE (4) MHS | TOTAL MHS |
|---------------------------------------------------------------|-----------------------------------|-----------------------------|-----------------------------------|------------------------|-----------|
| I can afford to pay for this service                          | 57.29%<br>55                      | 17.71%<br>17                | 12.50%<br>12                      | 12.50%<br>12           | 96        |
| They listen to me                                             | 40.82%<br>40                      | 37.76%<br>37                | 16.33%<br>16                      | 5.10%<br>5             | 98        |
| Limited options/choice of service providers in my area        | 39.18%<br>38                      | 27.84%<br>27                | 22.68%<br>22                      | 10.31%<br>10           | 97        |
| They include/collaborate with me                              | 38.78%<br>38                      | 35.71%<br>35                | 17.35%<br>17                      | 8.16%<br>8             | 98        |
| I feel I have some say or control in making decisions         | 38.78%<br>38                      | 37.76%<br>37                | 14.29%<br>14                      | 9.18%<br>9             | 98        |
| I trust them                                                  | 36.73%<br>36                      | 38.78%<br>38                | 14.29%<br>14                      | 10.20%<br>10           | 98        |
| I feel safe there                                             | 36.73%<br>36                      | 38.78%<br>38                | 16.33%<br>16                      | 8.16%<br>8             | 98        |
| I have a consistent worker                                    | 34.69%<br>34                      | 32.65%<br>32                | 16.33%<br>16                      | 16.33%<br>16           | 98        |
| I don't feel judged / stigmatised by them                     | 33.67%<br>33                      | 40.82%<br>40                | 16.33%<br>16                      | 9.18%<br>9             | 98        |
| They don't make me repeat my story too much                   | 32.99%<br>32                      | 34.02%<br>33                | 23.71%<br>23                      | 9.28%<br>9             | 97        |
| The service meets my needs                                    | 29.59%<br>29                      | 47.96%<br>47                | 15.31%<br>15                      | 7.14%<br>7             | 98        |
| They are organised and coordinate the support services I need | 24.49%<br>24                      | 29.59%<br>29                | 28.57%<br>28                      | 17.35%<br>17           | 98        |
| I don't have to wait too long to see someone                  | 23.96%<br>23                      | 36.46%<br>35                | 26.04%<br>25                      | 13.54%<br>13           | 96        |
| They respect my privacy if I don't want to include my family  | 21.43%<br>21                      | 23.47%<br>23                | 23.47%<br>23                      | 31.63%<br>31           | 98        |
| They seem to have a clear plan/goals                          | 17.35%<br>17                      | 36.73%<br>36                | 33.67%<br>33                      | 12.24%<br>12           | 98        |
| I am able to see a worker whose gender is of my choosing      | 16.49%<br>16                      | 23.71%<br>23                | 38.14%<br>37                      | 21.65%<br>21           | 97        |
| They include my family/carer                                  | 11.22%<br>11                      | 8.16%<br>8                  | 33.67%<br>33                      | 46.94%<br>46           | 98        |
